# Supplementary material for: Synthesis, characterization and biological evaluation of a novel biscarboxymethyl-modified tetraphenylchlorin compound for photodynamic therapy
Source: Royal Society of Chemistry journal article supplement (doi:10.1039/c6ra01813k), 2016-01-01
Supplement: c6ra01813k1.pdf [file c6ra01813k1.pdf]

Electronic Supplementary Material (ESI) for RSC Advances.  
This journal is © The Royal Society of Chemistry 2016

## Supporting Information

### Synthesis, characterization and biological evaluation of a novel biscarboxymethyl-modified tetraphenylchlorin compound for photodynamic therapy

Pingyong Liao<sup>a</sup>, Xianghua Zhang<sup>b</sup>, Lijun Zhang<sup>a</sup>, Xinrong Wang<sup>a</sup>, Wei Zhu<sup>a</sup>, Jingjian Sun<sup>b</sup>, Yijia Yan<sup>c</sup>, Lixin Zhang<sup>c</sup>, Na Chen<sup>c</sup> and Zhilong Chen<sup>a\*</sup>

<sup>a</sup> Department of pharmaceutical Science & Technology, College of Chemistry and Biology, Donghua University, Shanghai 201620, P. R. China

<sup>b</sup> Eastern Hepatobiliary Surgery Hospital, Second Military Medical University, Shanghai 200433, China

<sup>c</sup> Shanghai Xianhui Pharmaceutical Co. Ltd., Shanghai 200433, China

\* Corresponding author: Zhi-Long Chen, Tel/Fax: 86-21-67792654. E-mail: zlchen1967@qq.com

### Table of contents

|                                                                                        |    |
|----------------------------------------------------------------------------------------|----|
| <sup>1</sup> HNMR spectrum of compound 2 .....                                         | S1 |
| MS (MALDI-TOF) spectrum of compound 2 .....                                            | S2 |
| <sup>1</sup> HNMR spectrum of compound 3 .....                                         | S3 |
| MS (MALDI-TOF) spectrum of compound 3 .....                                            | S4 |
| <sup>1</sup> HNMR spectrum of BCTC .....                                               | S5 |
| <sup>13</sup> CNMR spectrum of BCTC .....                                              | S6 |
| MS (ESI) spectrum of BCTC .....                                                        | S7 |
| HRMS (ESI) spectrum of BCTC .....                                                      | S8 |
| Images of mice bearing Eca-109 tumors before and following PDT at each time point..... | S9 |

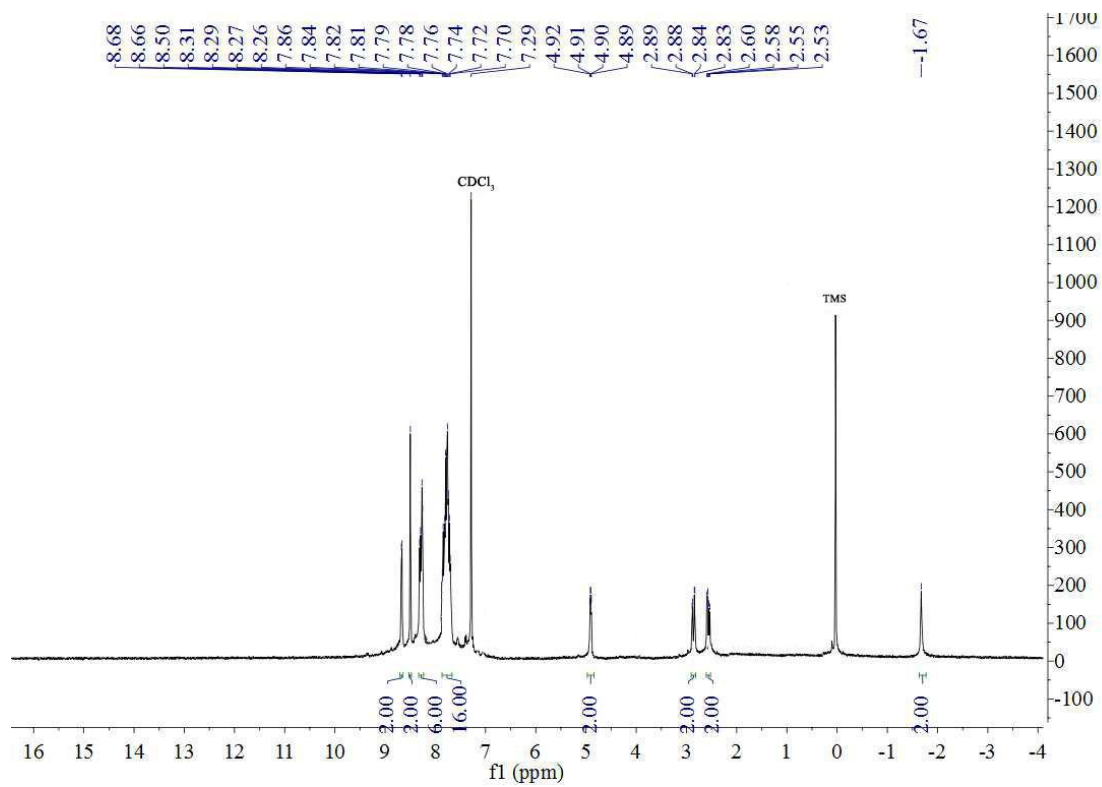

Figure S1. <sup>1</sup>H NMR of compound 2 in CDCl<sub>3</sub>

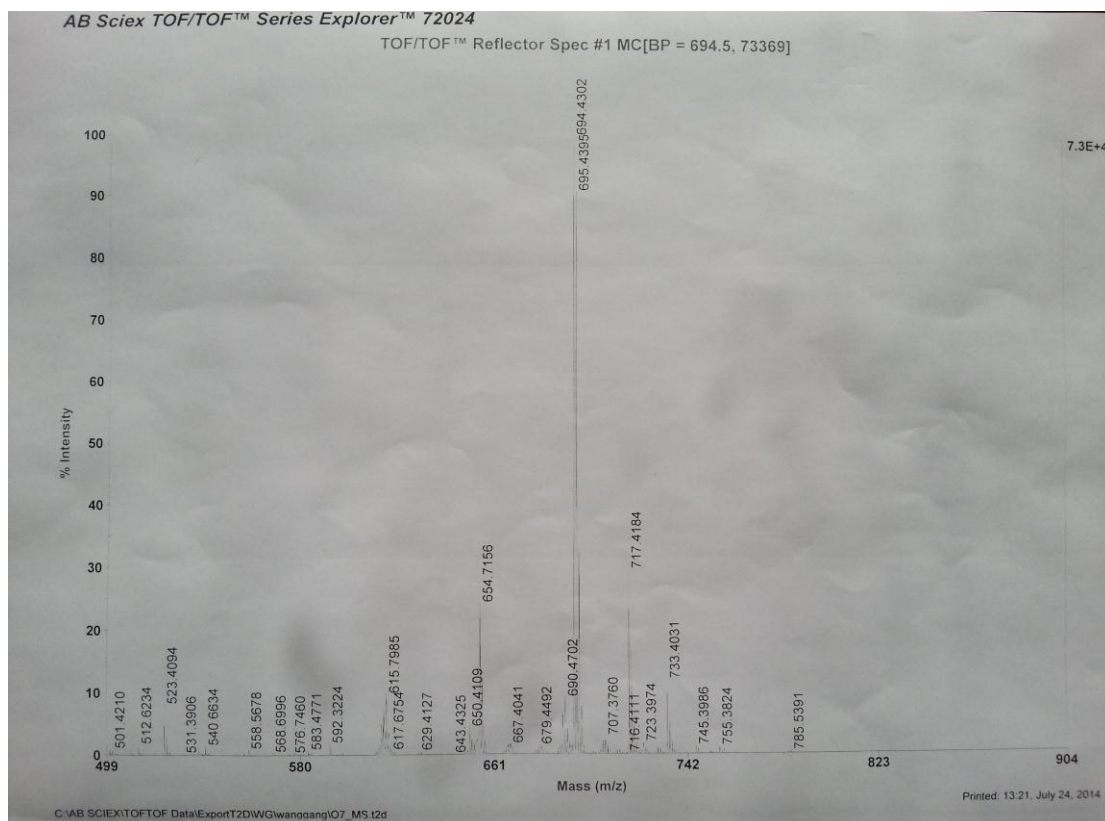

Figure S2. Ms (MALDI-TOF) of compound 2

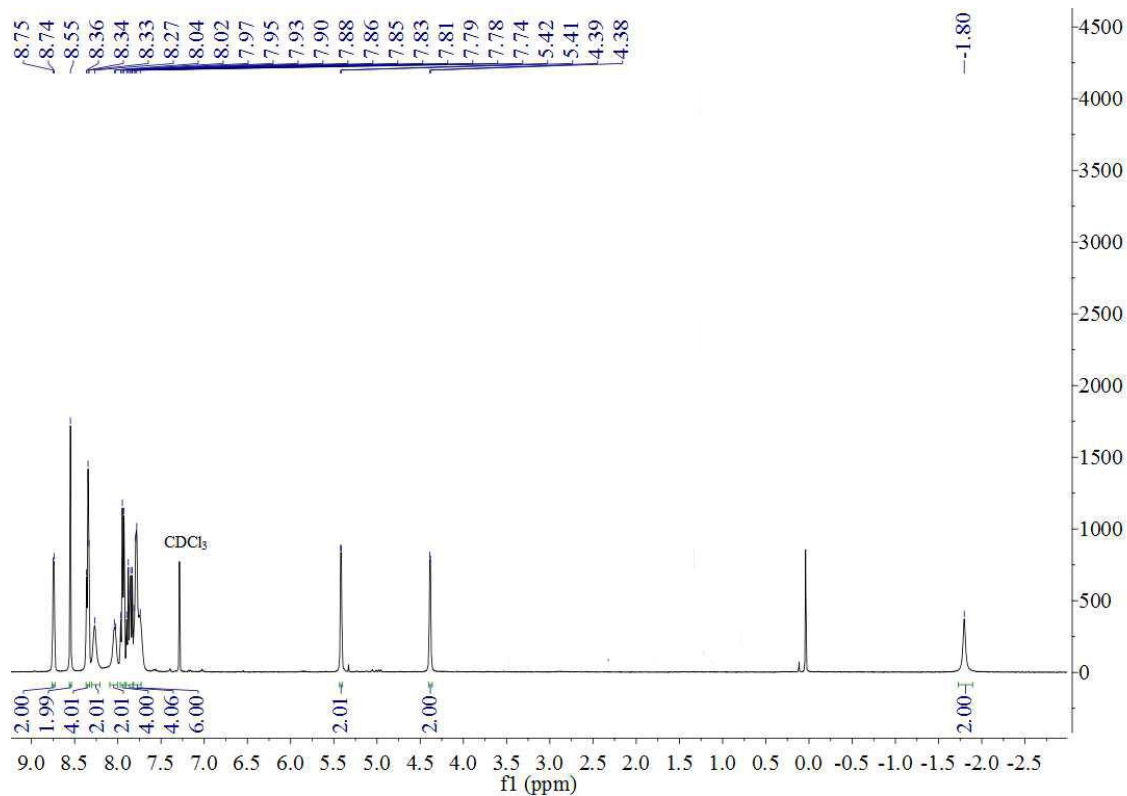

Figure S3.  $^1\text{H}$  NMR of compound 3 in  $\text{CDCl}_3$

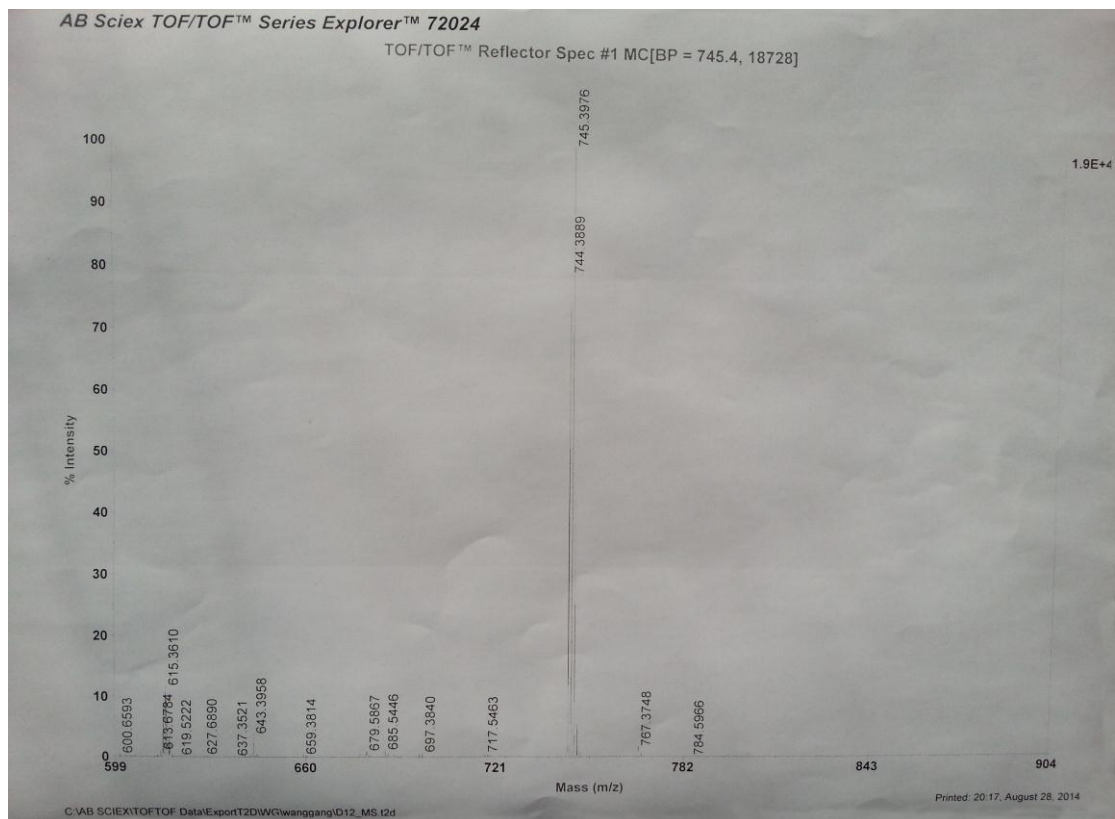

Figure S4. Ms (MALDI-TOF) of compound 3

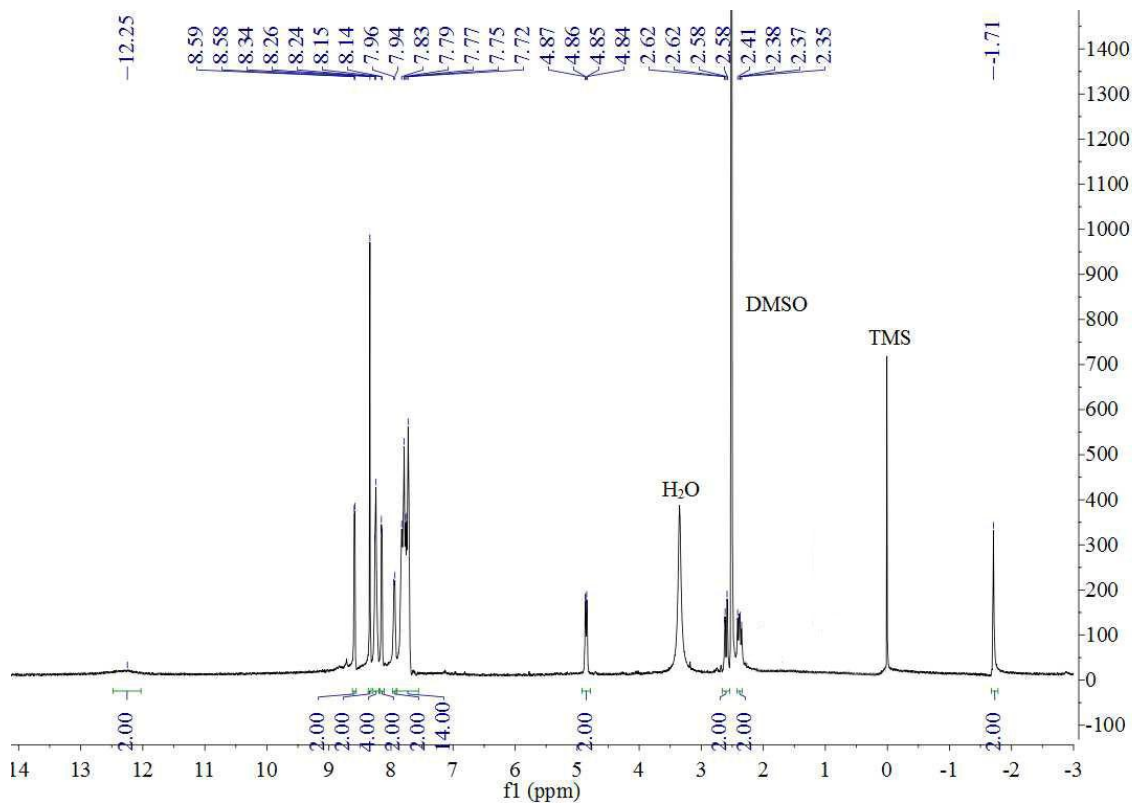

Figure S5.  $^1\text{H}$  NMR of BCTC in  $\text{DMSO-}d_6$

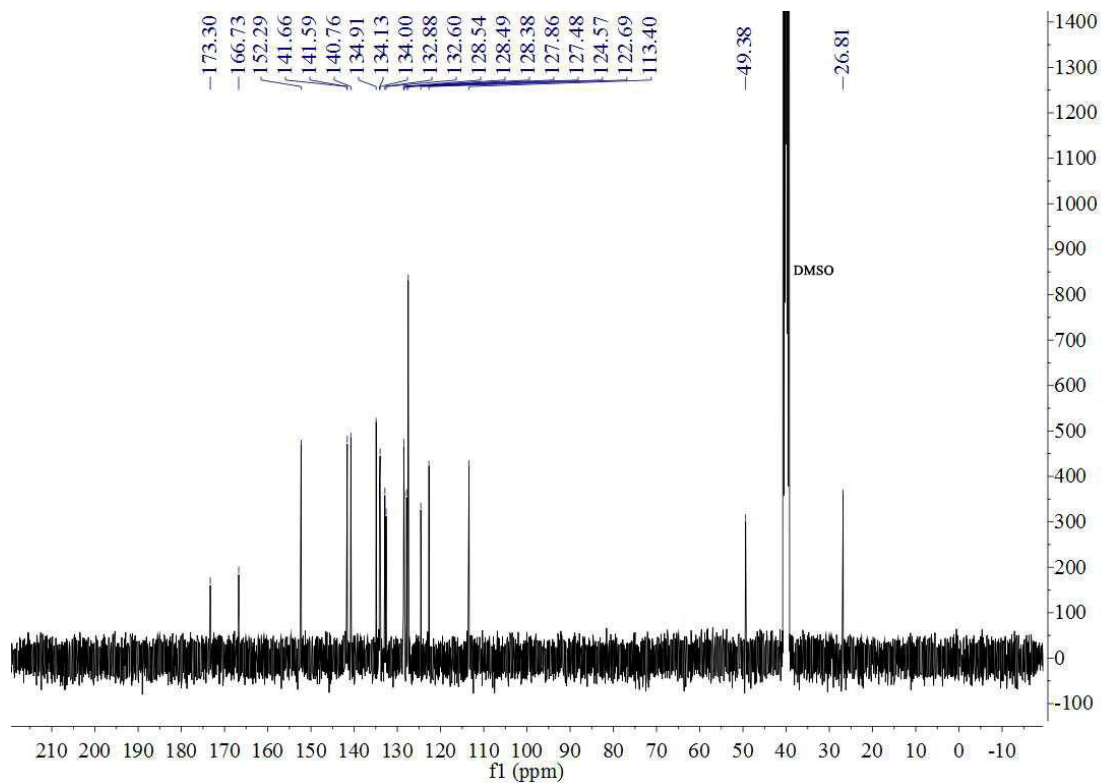

Figure S6.  $^{13}\text{C}$  NMR of BCTC in  $\text{DMSO-}d_6$

## Display Report

### Analysis Info

Analysis Name D:\Data\zjf\2015\20150413\_000006.d  
Method XMASS\_Method  
Sample Name 732  
Comment

Acquisition Date 4/13/2015 10:15:19 AM

Operator FTMS\_USER  
Instrument apex-III

### Acquisition Parameter

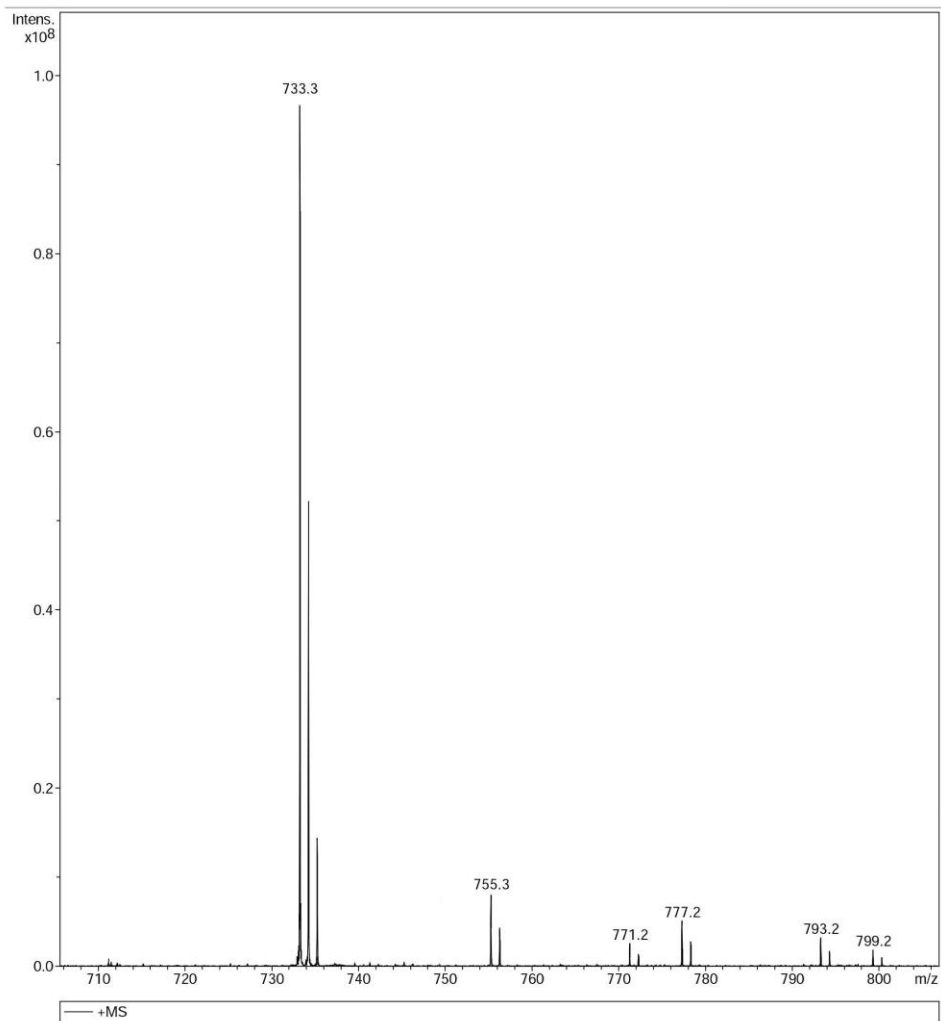

Figure S7. MS (ESI) of BCTC

National Center for Organic Mass Spectrometry  
Shanghai Institute of Organic Chemistry  
Chinese Academy of Sciences  
High Resolution MS Data Report

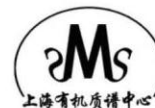

Instrument

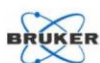

Bruker Daltonics, Inc. APEXIII 7.0 TESLA FTMS

Card Serial Number F150327  
Analysis Name D:\Data\zjf\2015\20150413\_000006.d  
Sample Name 732  
Acquisition Date 4/13/2015 10:15:19 AM  
Operator: zjf  
Ionization Mode ESI-Positive  
Ion Mass (Measured) 733.2820

| Sum Formula       | Sigma | m/z      | Err [ppm] | Mean Err [ppm] | Err [mDa] | rdb   | N Rule | e <sup>-</sup> |
|-------------------|-------|----------|-----------|----------------|-----------|-------|--------|----------------|
| C 48 H 37 N 4 O 4 | 0.002 | 733.2809 | -1.39     | -1.45          | -1.02     | 32.50 | ok     | even           |
| C 50 H 39 N 1 O 5 | 0.008 | 733.2823 | 0.44      | 0.47           | 0.32      | 32.00 | ok     | odd            |
| C 47 H 41 O 8     | 0.013 | 733.2796 | -3.22     | -3.16          | -2.36     | 27.50 | ok     | even           |

Figure S8. HRMS (ESI) of BCTC

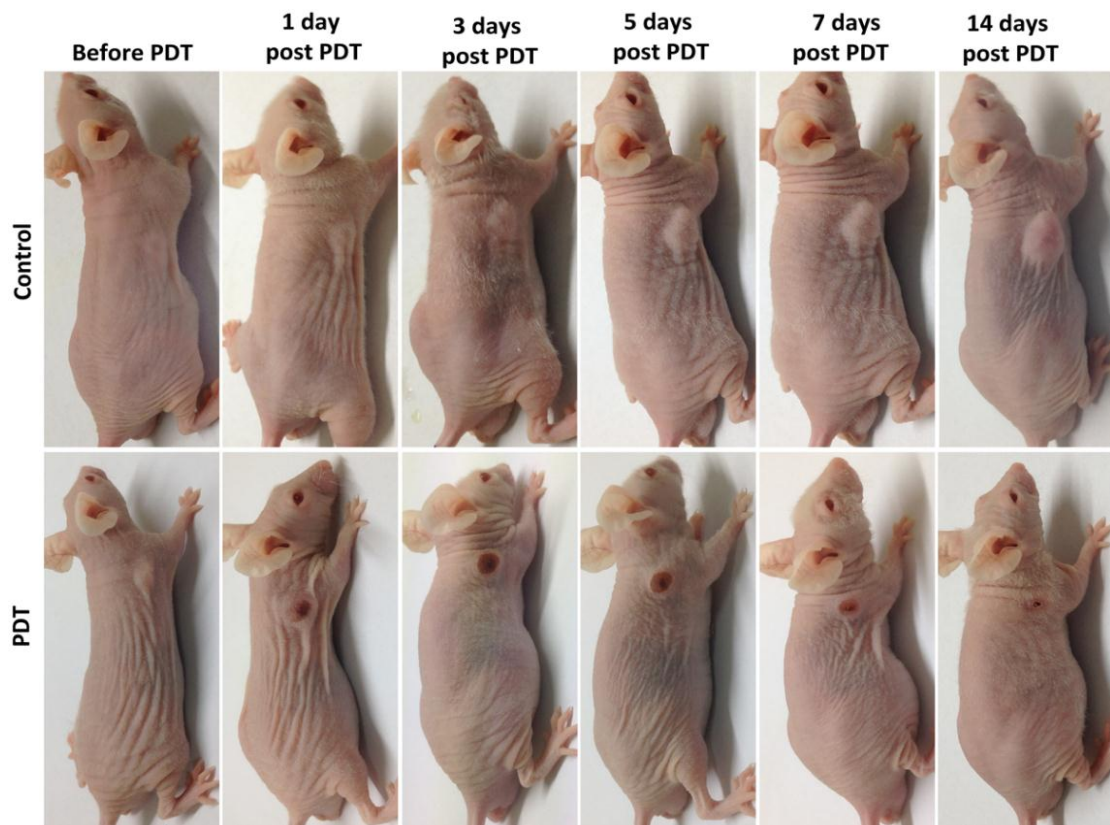

**Figure S9.** Efficacy of BTC against esophageal cancer in nude mice bearing Eca-109 tumors. Images of mice bearing Eca-109 tumors before and following PDT at each time point.
